# Supplementary material for: Microbiological Study in Petrol-Spiked Soil
Source: MDPI journal article supplement (doi:10.3390/molecules26092664), 2021-05-01
Supplement: s1 [file s1]

## Supplementary materials

# Microbiological Study in Petrol-Spiked Soil

Agata Borowik, Jadwiga Wyszowska\* and Jan Kucharski

<sup>1</sup> Department of Soil Science and Microbiology, University of Warmia and Mazury in Olsztyn, Poland; agata.borowik@uwm.edu.pl (A.B.); jadwiga.wyszowska@uwm.edu.pl (J.W.); jan.kucharski@uwm.edu.pl (J.K.)

\* Correspondence: jadwiga.wyszowska@uwm.edu.pl

**Table S1.** Effect of petrol (P) and cocksfoot (G) on the count of organotrophic bacteria (Org), actinobacteria (Act), and fungi (Fun) in the soil, 10<sup>n</sup> cfu kg<sup>-1</sup> soil d.m. n – for Org and Act = 9, and for Fun = 7.

| Object | Org · 10 <sup>9</sup>       | Act · 10 <sup>9</sup>       | Fun · 10 <sup>7</sup>      |
|--------|-----------------------------|-----------------------------|----------------------------|
| C      | 12.361 ± 0.589 <sup>d</sup> | 11.658 ± 1.281 <sup>d</sup> | 3.216 ± 0.353 <sup>c</sup> |
| P      | 18.362 ± 0.874 <sup>b</sup> | 20.865 ± 0.993 <sup>b</sup> | 4.956 ± 0.236 <sup>b</sup> |
| G      | 15.394 ± 0.733 <sup>c</sup> | 13.543 ± 0.645 <sup>c</sup> | 5.237 ± 0.249 <sup>b</sup> |
| GP     | 25.381 ± 1.208 <sup>a</sup> | 28.600 ± 1.362 <sup>a</sup> | 7.159 ± 0.341 <sup>a</sup> |

Homogeneous groups denoted with letters (a-d) were calculated separately for each of the microorganisms. C - non-polluted and non-sown soil, G - non-polluted soil sown with cocksfoot, P - non-sown soil polluted with petrol, GP - soil polluted with petrol and sown with cocksfoot.

**Table S2.** Effect of petrol (P) and cocksfoot (G) on the activity of enzymes in 1 kg of soil d.m. within 1 h.

| Object | Deh                        | Cat                        | Ure                        | Glu                        | Pac                        | Pal                        | Aryl                       |
|--------|----------------------------|----------------------------|----------------------------|----------------------------|----------------------------|----------------------------|----------------------------|
|        | μmol TFF                   | mol O <sub>2</sub>         | mmol N-NH <sub>4</sub>     | mmol PNP                   |                            |                            |                            |
| C      | 0.666 ± 0.032 <sup>d</sup> | 0.098 ± 0.005 <sup>c</sup> | 0.364 ± 0.009 <sup>b</sup> | 0.277 ± 0.008 <sup>b</sup> | 1.201 ± 0.057 <sup>a</sup> | 0.160 ± 0.008 <sup>b</sup> | 0.102 ± 0.005 <sup>b</sup> |
| P      | 1.384 ± 0.048 <sup>c</sup> | 0.091 ± 0.006 <sup>c</sup> | 0.302 ± 0.010 <sup>c</sup> | 0.303 ± 0.008 <sup>a</sup> | 0.785 ± 0.037 <sup>c</sup> | 0.157 ± 0.007 <sup>b</sup> | 0.082 ± 0.004 <sup>c</sup> |
| G      | 2.920 ± 0.119 <sup>a</sup> | 0.235 ± 0.010 <sup>b</sup> | 0.727 ± 0.020 <sup>a</sup> | 0.265 ± 0.008 <sup>b</sup> | 0.930 ± 0.044 <sup>b</sup> | 0.244 ± 0.012 <sup>a</sup> | 0.122 ± 0.003 <sup>a</sup> |
| GP     | 1.609 ± 0.051 <sup>b</sup> | 0.249 ± 0.010 <sup>a</sup> | 0.382 ± 0.016 <sup>b</sup> | 0.291 ± 0.011 <sup>a</sup> | 0.897 ± 0.043 <sup>b</sup> | 0.243 ± 0.012 <sup>a</sup> | 0.105 ± 0.005 <sup>b</sup> |

Homogeneous groups denoted with letters (a-d) were calculated separately for each enzyme. C - non-polluted and non-sown soil, P - non-sown soil polluted with petrol, G - non-polluted soil sown with cocksfoot, GP - soil polluted with petrol and sown with cocksfoot, Deh - dehydrogenases, Cat - catalase, Ure - urease, Glu - β-glucosidase, Pac - acid phosphatase, Pal - alkaline phosphatase, Aryl - arylsulfatase

**Table S3.** Main properties of soil used in the study

| Granulo-<br>metric sub-<br>group | Particle diameter, mm           |              |                | pH <sub>KCl</sub> | N <sub>total</sub> | C <sub>org</sub> |
|----------------------------------|---------------------------------|--------------|----------------|-------------------|--------------------|------------------|
|                                  | 2.0-0.050                       | 0.05-0.002   | <0.002         |                   |                    |                  |
|                                  | %                               |              |                |                   | g kg <sup>-1</sup> |                  |
| sandy loam                       | 74.93 ± 0.19                    | 22.85 ± 0.11 | 2.22 ± 0.01    | 6.7 ± 0.01        | 0.62 ± 0.00        | 9.30 ± 0.02      |
| available forms                  | exchangeable cations            |              |                |                   |                    |                  |
| mg kg <sup>-1</sup> d.m. of soil | g kg <sup>-1</sup> d.m. of soil |              |                |                   |                    |                  |
| P                                | K                               | Mg           | K <sub>e</sub> | Ca <sub>e</sub>   | Na <sub>e</sub>    | Mg <sub>w</sub>  |
| 93.68 ± 0.17                     | 141.10 ± 0.42                   | 42.00 ± 0.15 | 156.00 ± 0.40  | 623.50 ± 0.96     | 40.00 ± 0.10       | 59.50 ± 0.15     |

N<sub>total</sub> – total nitrogen, C<sub>org</sub> - total organic carbon, P - available phosphorus, K - available potassium, Mg - available magnesium, K<sub>e</sub> – exchangeable potassium, Ca<sub>e</sub> – exchangeable calcium, Na<sub>e</sub> – exchangeable sodium, Mg<sub>e</sub> – exchangeable magnesium

**Table S4.** One-way significance tests carried out using the analysis of variance (ANOVA).

| Object/Index                          |                                  | SS       | MS       | F          | P     |
|---------------------------------------|----------------------------------|----------|----------|------------|-------|
| Numbers of microorganisms             | Organotrophic bacteria           | 372.547  | 124.182  | 159.829    | 0.000 |
|                                       | Actinobacteria                   | 715.509  | 238.503  | 194.834    | 0.000 |
|                                       | Fungi                            | 31.286   | 10.429   | 116.256    | 0.000 |
| RS                                    | Organotrophic bacteria           | 0.035    | 0.035    | 21.261     | 0.004 |
|                                       | Actinobacteria                   | 0.058    | 0.058    | 2021.224   | 0.000 |
|                                       | Fungi                            | 0.054    | 0.054    | 16.243     | 0.007 |
| IF <sub>P</sub>                       | Organotrophic bacteria           | 0.054    | 0.054    | 38.674     | 0.001 |
|                                       | Actinobacteria                   | 0.207    | 0.207    | 130.086    | 0.000 |
|                                       | Fungi                            | 0.061    | 0.061    | 53.726     | 0.000 |
| IF <sub>G</sub>                       | Organotrophic bacteria           | 0.038    | 0.038    | 9.429      | 0.022 |
|                                       | Actinobacteria                   | 0.087    | 0.087    | 23.156     | 0.003 |
|                                       | Fungi                            | 0.070    | 0.070    | 14.545     | 0.009 |
| Colony development index (CD)         | Organotrophic bacteria           | 167.140  | 55.710   | 22.440     | 0.000 |
|                                       | Actinobacteria                   | 107.262  | 35.754   | 14.564     | 0.000 |
|                                       | Fungi                            | 90.210   | 30.070   | 3.947      | 0.036 |
| Ecophysiological diversity index (EP) | Organotrophic bacteria           | 0.054    | 0.018    | 11.303     | 0.001 |
|                                       | Actinobacteria                   | 0.009    | 0.003    | 1.121      | 0.379 |
|                                       | Fungi                            | 0.262    | 0.087    | 23.515     | 0.000 |
| Shannon-Weiner's diversity index      | Phylum                           | 0.261    | 0.087    | 30.510     | 0.000 |
|                                       | Class                            | 0.342    | 0.114    | 34.630     | 0.000 |
|                                       | Order                            | 0.284    | 0.095    | 11.590     | 0.001 |
|                                       | Family                           | 0.324    | 0.108    | 6.254      | 0.008 |
|                                       | Genus                            | 0.968    | 0.323    | 63.520     | 0.000 |
| Enzymes                               | Dehydrogenases                   | 10.614   | 3.538    | 702.445    | 0.000 |
|                                       | Catalase                         | 0.088    | 0.029    | 449.698    | 0.000 |
|                                       | Urease                           | 0.442    | 0.147    | 709.610    | 0.000 |
|                                       | Acid phosphatase                 | 0.374    | 0.125    | 89.590     | 0.000 |
|                                       | Alkaline phosphatase             | 0.029    | 0.010    | 100.760    | 0.000 |
|                                       | Arylsulfatase                    | 0.003    | 0.001    | 61.862     | 0.000 |
|                                       | β-glucosidase                    | 0.003    | 0.001    | 13.760     | 0.000 |
| RS                                    | Dehydrogenases                   | 0.349    | 0.349    | 2111.693   | 0.000 |
|                                       | Catalase                         | 0.001    | 0.001    | 0.143      | 0.718 |
|                                       | Urease                           | 0.251    | 0.251    | 72.622     | 0.000 |
|                                       | Acid phosphatase                 | 0.396    | 0.396    | 619.531    | 0.000 |
|                                       | Alkaline phosphatase             | 0.002    | 0.002    | 0.602      | 0.467 |
|                                       | Arylsulfatase                    | 0.013    | 0.013    | 297.800    | 0.000 |
|                                       | β-glucosidase                    | 0.000    | 0.000    | 0.240      | 0.640 |
| IF <sub>P</sub>                       | Dehydrogenases                   | 4.676    | 4.676    | 6356.273   | 0.000 |
|                                       | Catalase                         | 0.035    | 0.035    | 872.472    | 0.000 |
|                                       | Urease                           | 0.186    | 0.186    | 205.834    | 0.000 |
|                                       | Acid phosphatase                 | 0.193    | 0.193    | 13852.870  | 0.000 |
|                                       | Alkaline phosphatase             | 0.001    | 0.001    | 626.594    | 0.000 |
|                                       | Arylsulfatase                    | 0.006    | 0.006    | 2628.920   | 0.000 |
|                                       | β-glucosidase                    | 0.000    | 0.000    | 5.560      | 0.056 |
| IF <sub>G</sub>                       | Dehydrogenases                   | 20.814   | 20.814   | 4159.505   | 0.000 |
|                                       | Catalase                         | 0.238    | 0.238    | 9.342      | 0.022 |
|                                       | Urease                           | 1.083    | 1.083    | 173.102    | 0.000 |
|                                       | Acid phosphatase                 | 0.271    | 0.271    | 13649.580  | 0.000 |
|                                       | Alkaline phosphatase             | 0.001    | 0.001    | 1.261      | 0.304 |
|                                       | Arylsulfatase                    | 0.013    | 0.013    | 2571.990   | 0.000 |
|                                       | β-glucosidase                    | 0.000    | 0.000    | 33.080     | 0.001 |
| PAH's                                 | C <sub>6</sub> -C <sub>12</sub>  | 0.110    | 0.110    | 0.110      | 0.752 |
|                                       | C <sub>12</sub> -C <sub>35</sub> | 53.050   | 53.050   | 109.090    | 0.000 |
|                                       | Ben                              | 10.580   | 10.580   | 456.000    | 0.000 |
|                                       | EtB                              | 0.030    | 0.030    | 2.000      | 0.177 |
|                                       | Tol                              | 0.020    | 0.020    | 1.000      | 0.452 |
|                                       | Xyl                              | 0.020    | 0.020    | 1.000      | 0.318 |
|                                       | Nap                              | 169.650  | 169.650  | 20298.000  | 0.000 |
|                                       | Ant                              | 1327.160 | 1327.160 | 84550.000  | 0.000 |
|                                       | Chr                              | 1089.511 | 1089.511 | 132790.200 | 0.000 |
|                                       | BaA                              | 372.100  | 372.100  | 37187.000  | 0.000 |
|                                       | BaP                              | 450.000  | 450.000  | 56257.000  | 0.000 |
|                                       | BbF                              | 383.645  | 383.645  | 145901.000 | 0.000 |
|                                       | BkF                              | 800.000  | 800.000  | 168672.500 | 0.000 |
|                                       | IP                               | 0.000    | 0.000    | 0.000      | 1.000 |
| The yield of grasses                  | Cut I                            | 1105.346 | 1105.346 | 254.230    | 0.000 |
|                                       | Cut II                           | 176.307  | 176.307  | 636.404    | 0.000 |
|                                       | Cut III                          | 12.251   | 12.251   | 37.525     | 0.001 |

F – F-test; P – level of probability.

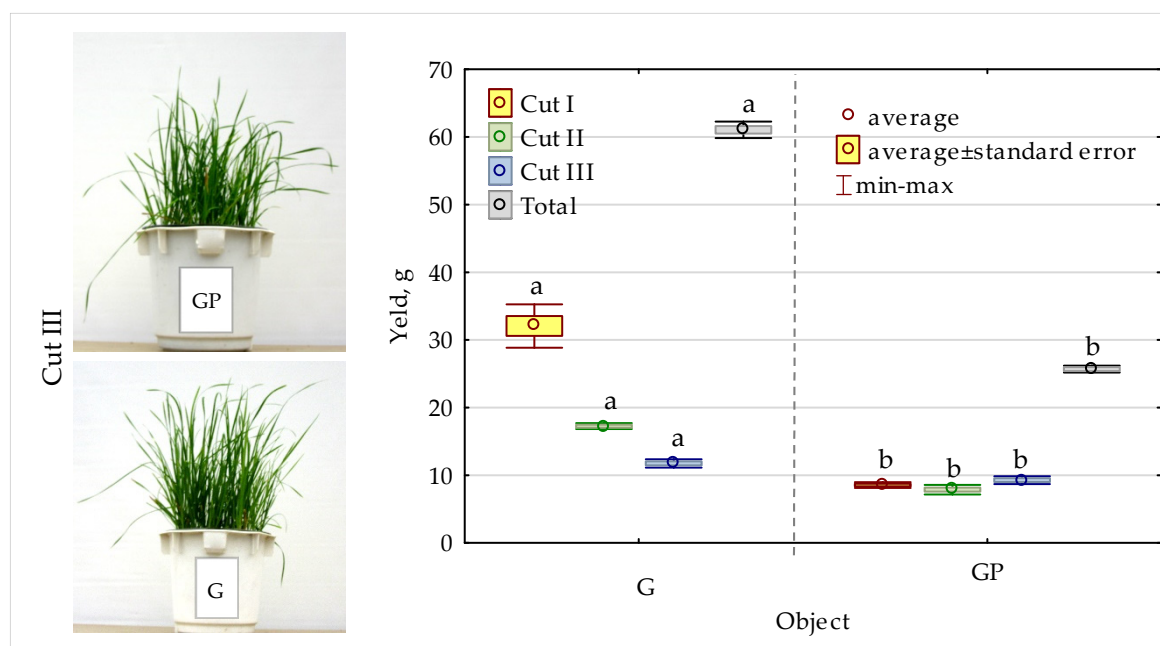

**Figure S1.** Effect of petrol on the yield of cocksfoot, d.m. in g per pot. G - non-polluted soil sown with cocksfoot, GP - soil polluted with petrol and sown with cocksfoot.
